# Supplementary material
Source: ML conference proceedings conference paper supplement (https://proceedings.neurips.cc/paper_files/paper/2019/hash/21b29648a47a45ad16bb0da0c004dfba-Abstract.html)
Supplement: Supplementary file [file 21b29648a47a45ad16bb0da0c004dfba-Supplemental.zip]

## Appendix A Proofs

### A.1 Proof of Lemma 2

The first equation  $\kappa_\lambda(t) = \kappa_{1-\lambda}(1/t)$  can be verified directly by plugging in  $1 - \lambda$  and  $1/t$ . In the sequel, we show the second equation  $\kappa_\lambda(t) \in [L(\lambda), U(\lambda)]$ , which needs a detailed and careful analysis and discussion. The derivative of  $\kappa_\lambda$ , denoted by  $\kappa'_\lambda(t)$ , is

$$\frac{2(\lambda(\sqrt{t}-1)+1)\ln(\lambda(t-1)+1)-2\lambda\sqrt{t}\ln(t)}{(\sqrt{t}-1)^3\sqrt{t}}.$$

We define  $f_1(t) = 2(\lambda(\sqrt{t}-1)+1)\ln(\lambda(t-1)+1)-2\lambda\sqrt{t}\ln(t)$ . Its derivative  $f'_1(t)$  is

$$-\frac{\lambda}{\sqrt{t}(\lambda(t-1)+1)}\left(2(\lambda-1)(\sqrt{t}-1)+(\lambda(t-1)+1)(\log(t)-\log(\lambda(t-1)+1))\right).$$

Define  $f_2(t) = 2(\lambda-1)(\sqrt{t}-1)+(\lambda(t-1)+1)(\log(t)-\log(\lambda(t-1)+1))$ . Its derivative  $f'_2(t)$  is

$$\frac{(\lambda-1)(\sqrt{t}-1)}{t} + \lambda(\log(t)-\log(\lambda(t-1)+1)).$$

Its second derivative  $f''_2(t)$  is

$$\frac{(1-\lambda)(2(\lambda-1)+\sqrt{t}(\lambda(t-1)+1))}{2t^2(\lambda(t-1)+1)}.$$

First, we assume  $\lambda \in (0, 1/2)$ . In this case, we have  $\frac{1-\lambda}{\lambda} > 1$  and  $\lambda(t-1)+1 > 0$ . Notice that  $f_3(t) = 2(\lambda-1)+\sqrt{t}(\lambda(t-1)+1)$  is a strictly increasing function in  $t$ . Therefore, if  $t > \left(\frac{1-\lambda}{\lambda}\right)^2$ , we obtain

$$f_3(t) > f_3\left(\left(\frac{1-\lambda}{\lambda}\right)^2\right) = \frac{(\lambda-1)(\lambda+1)(2\lambda-1)}{\lambda^2} > 0.$$

Therefore  $f''_2(t) > 0$  if  $t > \left(\frac{1-\lambda}{\lambda}\right)^2$ . Thus we deduce that  $f'_2(t)$  is increasing in  $t$  if  $t > \left(\frac{1-\lambda}{\lambda}\right)^2$ , which yields

$$f'_2(t) > f'_2\left(\left(\frac{1-\lambda}{\lambda}\right)^2\right) = \frac{\lambda(2\lambda+(1-\lambda)\log\left(\frac{1-\lambda}{\lambda}\right)-1)}{1-\lambda}.$$

Define  $g(\lambda) = 2\lambda+(1-\lambda)\log\left(\frac{1-\lambda}{\lambda}\right)-1$ . Its derivative  $g'(\lambda) = -\frac{1}{\lambda}-\log\left(\frac{1}{\lambda}-1\right)+2$  is negative if  $\lambda < 1/2$  and positive if  $\lambda > 1/2$ . Therefore  $g(\lambda) \geq g(1/2) = 0$ . Thus we obtain that if  $t > \left(\frac{1-\lambda}{\lambda}\right)^2$ ,  $f'_2(t) > 0$ , which implies that  $f_2(t)$  is increasing in  $t$  if  $t > \left(\frac{1-\lambda}{\lambda}\right)^2$ . Thus we have

$$f_2(t) > f_2\left(\left(\frac{1-\lambda}{\lambda}\right)^2\right) = \frac{(1-\lambda)(4\lambda+\log\left(\frac{1}{\lambda}-1\right)-2)}{\lambda}.$$

Define  $g_1(\lambda) = 4\lambda+\log\left(\frac{1}{\lambda}-1\right)-2$ . Its derivative  $g'_1(t) = \frac{1}{(\lambda-1)\lambda}+4$  is non-positive, which implies that  $g_1$  is decreasing in  $\lambda$ . Therefore, if  $t > \left(\frac{1-\lambda}{\lambda}\right)^2$ , we have

$$f_2(t) > \frac{1-\lambda}{\lambda}g(1/2) = 0.$$

Since  $\lambda(t-1)+1 > 0$ , we obtain that  $f'_1(t) < 0$  and therefore  $f_1(t)$  is decreasing if  $t > \left(\frac{1-\lambda}{\lambda}\right)^2$ . We have

$$f_1(t) < f_1\left(\left(\frac{1-\lambda}{\lambda}\right)^2\right) = 0.$$

If  $t > \left(\frac{1-\lambda}{\lambda}\right)^2$ , since  $(\sqrt{t}-1)^3\sqrt{t} > 0$ , we deduce that  $\kappa'_\lambda(t) < 0$ .

If  $t < 1$ , since  $f_3(t)$  is strictly increasing in  $t$ , we have  $f_3(t) < f_3(1) = 2\lambda - 1 < 0$ , which implies that  $f_2''(t) < 0$ . Therefore, we obtain that  $f_2'(t)$  is strictly decreasing on  $(0, 1)$ . Thus we have  $f_2'(t) > f_2'(1) = 0$ , which implies that  $f_2(t)$  is strictly increasing on  $(0, 1)$ . We immediately have  $f_2(t) < f_2(1) = 0$  for  $\forall t \in (0, 1)$ , which yields that  $f_1'(t) > 0$  and therefore  $f_1(t)$  is strictly increasing on  $(0, 1)$ . For  $\forall t \in (0, 1)$ , it holds that  $f_1(t) < f_1(1) = 0$ . Since  $(\sqrt{t} - 1)^3 \sqrt{t} < 0$ , we deduce that  $\kappa'_\lambda(t) > 0$  for  $t \in (0, 1)$ .

The interval that remains unexplored is  $I = \left(1, \left(\frac{1-\lambda}{\lambda}\right)^2\right)$ . Since  $f_3(1) = 2\lambda - 1 < 0$  and  $f_3\left(\left(\frac{1-\lambda}{\lambda}\right)^2\right) = \frac{(\lambda-1)(\lambda+1)(2\lambda-1)}{\lambda^2} > 0$ , we know that  $f_3(t)$  has a real root on this interval. Notice that  $f_3(t)$  can be viewed as a cubic function in  $\sqrt{t}$ . Define  $f_4(x) = 2\lambda + \lambda x^3 + (1-\lambda)x - 2$  and we have  $f_3(t) = f_4(\sqrt{t})$ . The cubic function  $f_4$  is strictly monotone if  $\lambda \in (0, 1)$ . Therefore, the real root of  $f_3$  on  $I$  is unique and we denote it by  $\rho(\lambda)$ .

Now we divide the interval  $I = \left(1, \left(\frac{1-\lambda}{\lambda}\right)^2\right)$  into two subintervals  $I_1 = (1, \rho(\lambda))$  and  $I_2 = \left(\rho(\lambda), \left(\frac{1-\lambda}{\lambda}\right)^2\right)$ . Since  $f_3(t) < 0$  on  $I_1$  and  $f_3(t) > 0$  on  $I_2$ , we have  $f_2''(t) < 0$  on  $I_1$  and  $f_2''(t) > 0$  on  $I_2$ . Therefore, we deduce that  $f_2'(t)$  strictly decreases on  $I_1$  and strictly increases on  $I_2$ . Note that  $f_2'(1) = 0$  and

$$f_2'\left(\left(\frac{1-\lambda}{\lambda}\right)^2\right) = \frac{\lambda(2\lambda + (1-\lambda)\log\left(\frac{1-\lambda}{\lambda}\right) - 1)}{1-\lambda} > 0.$$

To see this, we define  $g_2(\lambda) = 2\lambda + (1-\lambda)\log\left(\frac{1-\lambda}{\lambda}\right) - 1$ . Its second derivative is  $g_2''(\lambda) = \frac{1}{\lambda^2 - \lambda^3} > 0$ , which implies that  $g_2(\lambda)$  is strictly convex and  $g_2'(\lambda)$  has a unique root. Observe that  $\lambda = 1/2$  is a root of  $g_2'(\lambda)$ . We deduce that  $g_2(\lambda) > g_2(1/2) = 0$  for  $\lambda \in (0, 1/2)$ , which immediately yields that  $f_2'\left(\left(\frac{1-\lambda}{\lambda}\right)^2\right) > 0$ . Thus the function  $f_2'(t)$  has a unique root (denoted by  $\rho_1(\lambda)$ ) on  $I$ . Therefore, the function  $f_2(t)$  strictly decreases on  $I_3 = (1, \rho_1(\lambda))$  and strictly increases on  $I_4 = \left(\rho_1(\lambda), \left(\frac{1-\lambda}{\lambda}\right)^2\right)$ . Note that  $f_2(1) = 0$  and

$$f_2\left(\left(\frac{1-\lambda}{\lambda}\right)^2\right) = \frac{(1-\lambda)(4\lambda + \log\left(\frac{1-\lambda}{\lambda}\right) - 2)}{\lambda} > 0.$$

To see the above inequality, we define  $g_3(\lambda) = 4\lambda + \log\left(\frac{1-\lambda}{\lambda}\right) - 2$ . Its derivative is  $g_3'(\lambda) = \frac{(1-2\lambda)^2}{(\lambda-1)\lambda} < 0$ , which implies that  $g_3(\lambda)$  strictly decreases and that  $g_3(\lambda) > g_3(1/2) = 0$  for  $\lambda \in (0, 1/2)$ . As a result, we deduce that  $f_2\left(\left(\frac{1-\lambda}{\lambda}\right)^2\right) > 0$ . Thus we obtain that the function  $f_2(t)$  has a unique root (denoted by  $\rho_2(\lambda)$ ) on  $I$  and that  $f_1'(t)$  is positive on  $I_5 = (1, \rho_2(\lambda))$  and negative on  $I_6 = \left(\rho_2(\lambda), \left(\frac{1-\lambda}{\lambda}\right)^2\right)$ , which implies that  $f_1$  strictly increases on  $I_5$  and strictly decreases on  $I_6$ . Note that  $f_1(1) = f_1\left(\left(\frac{1-\lambda}{\lambda}\right)^2\right) = 0$ . We conclude that  $f_1(t) > 0$  on  $I$ , which implies that  $\kappa'_\lambda(t) > 0$  on  $I$ .

From the above analysis, we see that if  $\lambda \in (0, 1/2)$ , the function  $\kappa'_\lambda(t)$  has no real root on  $(0, \infty) \setminus \{1, \left(\frac{1-\lambda}{\lambda}\right)^2\}$ . Since

$$\lim_{t \rightarrow 1} \kappa_\lambda(t) = 4(1-\lambda)\lambda > 0, \quad \kappa_\lambda\left(\left(\frac{1-\lambda}{\lambda}\right)^2\right) = 0,$$

we deduce that the derivative  $\kappa'_\lambda(t)$  has a unique root at  $t = \left(\frac{1-\lambda}{\lambda}\right)^2$  if  $\lambda \in (0, 1/2)$ . By (??), we know that it also holds for  $\lambda \in (1/2, 1)$ . Furthermore, we know that the derivative is positive if  $t < \left(\frac{1-\lambda}{\lambda}\right)^2$  and is negative if  $t > \left(\frac{1-\lambda}{\lambda}\right)^2$ . Thus the maximum of  $\kappa_\lambda$  is attained at  $t = \left(\frac{1-\lambda}{\lambda}\right)^2$  and it is exactly  $U(\lambda)$ .

Next, we assume  $\lambda = 1/2$ . We have

$$\kappa_{1/2}(t) = \frac{t \log(t) + (t+1)(\log(2) - \log(t+1))}{(\sqrt{t} - 1)^2}.$$

Its derivative is

$$\kappa'_{1/2}(t) = \frac{(\sqrt{t} + 1) \log\left(\frac{t+1}{2}\right) - \sqrt{t} \log(t)}{(\sqrt{t} - 1)^3 \sqrt{t}}$$

Define  $f_5(t) = (\sqrt{t} + 1) \log\left(\frac{t+1}{2}\right) - \sqrt{t} \log(t)$ . Its derivative is

$$f'_5(t) = \frac{2(\sqrt{t} - 1) + (t + 1) \log\left(\frac{t+1}{2}\right) - (t + 1) \log(t)}{2\sqrt{t}(t + 1)}.$$

Then we define  $f_6(t) = 2(\sqrt{t} - 1) + (t + 1) \log\left(\frac{t+1}{2}\right) - (t + 1) \log(t)$ , whose derivative is

$$f'_6(t) = \frac{\sqrt{t} - 1}{t} - \log(2t) + \log(t + 1)$$

and second derivative

$$f''_6(t) = \frac{1}{t^3 + t^2} - \frac{1}{2t^{3/2}}.$$

If we set  $f''_6(t) > 0$ , we get  $t^{1/2} + t^{3/2} < 2$ , which is equivalent to  $t < 1$ . Therefore  $f''_6(t)$  is positive on  $(0, 1)$  and negative on  $(1, \infty)$ , which implies that  $f'_6(t) < f'_6(1) = 0$  for  $t \neq 1$ . We deduce that  $f_6(t)$  is strictly decreasing in  $t$  and thus has a unique root. Since  $t = 1$  is a root of  $f_6(t)$ , it is the unique root, which implies that  $f_6(t)$  and  $f'_5(t)$  are both positive on  $(0, 1)$  and negative on  $(1, \infty)$ . As a result, we deduce that  $f_5(t) < f_5(1) = 0$  for  $t \neq 1$ . Thus we conclude that  $\kappa'_{1/2}(t)$  is positive on  $(0, 1)$  and negative on  $(1, \infty)$ . We can verify that  $t = 1$  is indeed a root of  $\kappa'_{1/2}(t)$ .

So far we have shown for  $t \in (0, 1)$  that the derivative  $\kappa'_\lambda(t)$  is positive if  $t < \left(\frac{1-\lambda}{\lambda}\right)^2$  and is negative if  $t > \left(\frac{1-\lambda}{\lambda}\right)^2$ . Thus the maximum of  $\kappa_\lambda$  is attained at  $t = \left(\frac{1-\lambda}{\lambda}\right)^2$  and it is exactly  $U(\lambda)$ .

The infimum is

$$\begin{aligned} & \min\left\{\lim_{t \rightarrow 0^+} \kappa_\lambda(t), \lim_{t \rightarrow \infty} \kappa_\lambda(t)\right\} \\ &= \min\{-2(1 - \lambda) \ln(1 - \lambda), -2\lambda \ln \lambda\}. \end{aligned}$$

Therefore we conclude  $\kappa_\lambda \in [L(\lambda), U(\lambda)]$ .

## A.2 Proof of Theorem 1

In addition to Lemma 2, we need the following lemma.

**Lemma 6** (Theorem 6 of [31]). *Let  $f$  and  $g$  be two convex functions that satisfy  $f(1) = 0$  and  $g(1) = 0$ , respectively. The function  $g(t) > 0$  for every  $t \in (0, 1) \cup (1, \infty)$ . Let  $P$  and  $Q$  be two distributions on a common finite sample space  $\Omega$ . Define  $\beta_1 = \inf_{i \in \Omega} \frac{Q(i)}{P(i)}$  and  $\beta_2 = \inf_{i \in \Omega} \frac{P(i)}{Q(i)}$ . We assume that  $\beta_1, \beta_2 \in [0, 1)$ . Then we have*

$$D_f(P \parallel Q) \leq \kappa^* D_g(P \parallel Q),$$

where

$$\kappa^* = \sup_{\beta \in (\beta_2, 1) \cup (1, \beta_1^{-1})} \frac{f(\beta)}{g(\beta)}.$$

By Lemmas 2 and 6, we have

$$L(\lambda) H^2(P, Q) \leq D_{\text{GJS}}^\lambda(P \parallel Q) \leq U(\lambda) H^2(P, Q).$$

Now we show that  $U(\lambda) \leq 1$ . Its derivative  $U'(\lambda)$  has a unique root at  $\lambda = 1/2$  on the interval  $(0, 1)$  and it is positive if  $\lambda < 1/2$  and negative if  $\lambda > 1/2$ . Therefore  $U(\lambda) \leq U(1/2) = 1$ .

### A.3 Proof of Lemma 1

The equation  $m_\lambda(1) = 0$  can be verified by plugging in  $t = 1$  directly. We compute the second derivative of  $m_\lambda$

$$\frac{d^2 m_\lambda}{dt^2} = \frac{\lambda(1-\lambda)}{t^2\lambda + (1-\lambda)t}.$$

If  $\lambda \in [0, 1]$  and  $t \in (0, \infty)$ , we have  $\frac{d^2 m_\lambda}{dt^2} \geq 0$ , which implies the convexity of  $m_\lambda$ .

The  $m_\lambda$ -divergence equals to

$$D_{m_\lambda}(P \parallel Q) = \int_{\Omega} \lambda \ln \frac{dP}{dQ} dP - (\lambda dP + (1-\lambda)dQ) \ln \left( \lambda \frac{dP}{dQ} + 1 - \lambda \right)$$

while the MIL-divergence equals

$$\begin{aligned} D_{\text{GJS}}^\lambda(P \parallel Q) &= \int_{\Omega} \lambda \ln \frac{dP/dQ}{\lambda dP/dQ + (1-\lambda)} dP + (1-\lambda) \ln \frac{1}{\lambda dP/dQ + (1-\lambda)} dQ \\ &= \int_{\Omega} \lambda \ln \frac{dP}{dQ} dP - (\lambda dP + (1-\lambda)dQ) \ln \left( \lambda \frac{dP}{dQ} + 1 - \lambda \right). \end{aligned}$$

Thus we conclude that the  $m_\lambda$ -divergence yields the MIL-divergence with parameter  $\lambda$ .

### A.4 Proof of Proposition 1

Let  $P$  and  $Q$  be two probability measures in  $\mathcal{P}$ . If  $P$  and  $Q$  are equal,  $D_f(P \parallel Q) = 0$ . Therefore for any hash function  $h$ , it holds that  $h(P) = h(Q)$ , which implies that  $\Pr_{h \sim \mathcal{H}}[h(P) = h(Q)] = 1 \geq p_1$ .

In the sequel, we assume that  $P$  and  $Q$  are different. Since  $P$  and  $Q$  are two different distributions, there exists  $i \in \Omega$  such that  $P(i) < Q(i)$ . We show this by contradiction. Assume that  $\forall i \in \Omega, P(i) \geq Q(i)$ . Since  $P$  and  $Q$  are different, there exists  $i_0 \in \Omega$  such that  $P(i_0) \neq Q(i_0)$ . Since  $P(i) \geq Q(i)$  holds for  $\forall i \in \Omega$ , we have  $P(i_0) > Q(i_0)$ . Therefore  $\sum_{i \in \Omega} P(i) > \sum_{i \in \Omega} Q(i)$ . However, both  $P$  and  $Q$  sum to 1, which leads to a contradiction. Therefore, we obtain the existence of  $i$  such that  $P(i) < Q(i)$ , which yields  $\beta_2 \triangleq \inf_{i \in \Omega} \frac{P(i)}{Q(i)} < 1$ . Similarly, we have  $\beta_1 \triangleq \inf_{i \in \Omega} \frac{Q(i)}{P(i)} < 1$ . Since  $P(i)$  and  $Q(i)$  are non-negative for  $\forall i \in \Omega$ , we have  $\beta_1, \beta_2 \geq 0$ . In sum, we showed that  $\beta_1, \beta_2 \in [0, 1)$ . By the definition of  $\beta_0$ , we know the following interval inclusion

$$(\beta_2, \beta_1^{-1}) \subseteq (\beta_0, \beta_0^{-1}).$$

Recall that

$$\begin{aligned} U &= \sup_{\beta \in (\beta_0, 1) \cup (1, \beta_0^{-1})} \frac{f(\beta)}{g(\beta)}, \\ L &= \inf_{\beta \in (\beta_0, 1) \cup (1, \beta_0^{-1})} \frac{f(\beta)}{g(\beta)}. \end{aligned}$$

By Lemma 6, we obtain the approximation guarantee

$$L \cdot D_g(P \parallel Q) \leq D_f(P \parallel Q) \leq U \cdot D_g(P \parallel Q) \quad (6)$$

There are two cases to consider. In the first case, we assume that  $D_f(P \parallel Q) \leq Lr_1$ . By (6), we have  $D_g(P \parallel Q) \leq r_1$ . Since  $\mathcal{H}$  is an  $(r_1, r_2, p_1, p_2)$ -sensitive family for  $g$ -divergence, it holds that  $\Pr_{h \sim \mathcal{H}}[h(P) = h(Q)] \geq p_1$ . Similarly, if  $D_g(P \parallel Q) > Ur_2$ , we have  $\Pr_{h \sim \mathcal{H}}[h(P) = h(Q)] \leq p_2$ . Thus,  $\mathcal{H}$  forms an  $(Lr_1, Ur_2, p_1, p_2)$ -sensitive family for  $f$ -divergence on  $\mathcal{P}$ .

### A.5 Proof of Theorem 2

If  $D_{\text{GJS}}^\lambda(P \parallel Q) \leq R$ , by Theorem 1, we have

$$\left\| \sqrt{P} - \sqrt{Q} \right\|_2 \leq \sqrt{\frac{2R}{L(\lambda)}} \triangleq R_1.$$

If  $D_{\text{GJS}}^\lambda(P \parallel Q) \geq c^2 \frac{U(\lambda)}{L(\lambda)} R$ , we have

$$\left\| \sqrt{P} - \sqrt{Q} \right\|_2 \geq c \sqrt{\frac{2R}{L(\lambda)}} = cR_1.$$

By the construction and properties of locality-sensitive hash family for  $L^2$  distance proposed in [16, Section 3.2], we know that  $h_{\mathbf{a},b}$  forms a  $(R_1, cR_1, p_1, p_2)$ -sensitive hash family for the  $L^2$  distance between two vectors  $\sqrt{P}$  and  $\sqrt{Q}$ . Therefore, provided that  $D_{\text{GJS}}^\lambda(P \parallel Q) \leq R$ , which implies  $\left\| \sqrt{P} - \sqrt{Q} \right\|_2 \leq R_1$ , we have

$$\Pr[h_{\mathbf{a},b}(P) = h_{\mathbf{a},b}(Q)] \geq p_1.$$

Similarly, if  $D_{\text{GJS}}^\lambda(P \parallel Q) \geq c^2 \frac{U(\lambda)}{L(\lambda)} R$ , we have

$$\Pr[h_{\mathbf{a},b}(P) = h_{\mathbf{a},b}(Q)] \leq p_2.$$

### A.6 Proof of Theorem 3

The derivative of the ratio function  $\kappa(t) = \frac{\delta(t)}{\text{hel}(t)}$  is

$$\kappa'(t) = \frac{1-t}{\sqrt{t}(t+1)^2}.$$

It is positive when  $t < 1$  and negative when  $t > 1$ . Therefore for  $\forall t \in (0, \infty)$ ,  $\kappa(t) \leq \kappa(1) = 2$  and

$$\kappa(t) \geq \min\left\{\lim_{t \rightarrow 0^+} \kappa(t), \lim_{t \rightarrow \infty} \kappa(t)\right\} = 1.$$

By Lemma 6, we have

$$H^2(P, Q) \leq \Delta(P \parallel Q) \leq 2H^2(P, Q).$$

If  $\Delta(P \parallel Q) \leq R$ , we have

$$\left\| \sqrt{P} - \sqrt{Q} \right\|_2 \leq \sqrt{2R} \triangleq R_1.$$

If  $D_{\text{GJS}}^\lambda(P \parallel Q) \geq 2c^2 R$ , we have

$$\left\| \sqrt{P} - \sqrt{Q} \right\|_2 \geq \sqrt{2R}c = cR_1.$$

By the construction and properties of locality-sensitive hash family for  $L^2$  distance proposed in [16, Section 3.2], we know that  $h_{\mathbf{a},b}$  forms a  $(R_1, cR_1, p_1, p_2)$ -sensitive hash family for the  $L^2$  distance between two vectors  $\sqrt{P}$  and  $\sqrt{Q}$ . Therefore, provided that  $\Delta(P \parallel Q) \leq R$ , which implies  $\left\| \sqrt{P} - \sqrt{Q} \right\|_2 \leq R_1$ , we have

$$\Pr[h_{\mathbf{a},b}(P) = h_{\mathbf{a},b}(Q)] \geq p_1.$$

Similarly, if  $\Delta(P \parallel Q) \geq 2c^2 R$ , we have

$$\Pr[h_{\mathbf{a},b}(P) = h_{\mathbf{a},b}(Q)] \leq p_2.$$

### A.7 Proof of Lemma 3

First, we would like to note that  $k$  is homogeneous, *i.e.*, for all  $c \geq 0$ , it holds that  $k(cx, cy) = ck(x, y)$ . Its kernel signature [35] is

$$\mathcal{K}(\lambda) \triangleq k(e^{\lambda/2}, e^{-\lambda/2}) = e^{-\frac{\lambda}{2}} \left( (e^\lambda + 1) \ln(e^\lambda + 1) - e^\lambda \lambda \right).$$

First, let us review the definition of a positive definite function.

**Definition 4** ([9]). We call a complex-valued function  $f : \mathbb{R} \rightarrow \mathbb{C}$  is positive definite if

1. it is continuous in the finite region and is bounded on  $\mathbb{R}$
2. it is Hermitian, *i.e.*,  $\overline{f(-x)} = f(x)$
3. it satisfies the following conditions: for any real numbers  $x_1, \dots, x_n \in \mathbb{R}$ , the matrix

$$A = (f(x_i - x_j))_{i,j=1}^n$$

is positive semidefinite.

Next we will show that  $\mathcal{K}$  is a positive definite function by showing that it is the Fourier transform of a non-negative function. We have the following Fourier transform and inverse Fourier transform

$$\begin{aligned} \mathcal{K}(\lambda) &= \int_{\mathbb{R}} e^{-i\lambda w} \frac{2 \operatorname{sech}(\pi w)}{1 + 4w^2} dw, \\ \kappa(w) &\triangleq \frac{1}{2\pi} \int_{\mathbb{R}} \mathcal{K}(\lambda) e^{i\lambda w} d\lambda = \frac{2 \operatorname{sech}(\pi w)}{1 + 4w^2}. \end{aligned}$$

Then we need the following lemmata.

**Lemma 7.** *If  $f(x) = \int_{\mathbb{R}} e^{-ixt} g(t) dt$  is the Fourier transform of a non-negative function  $g(t)$ , then it is positive definite.*

*Proof of Lemma 7.* Let  $x_1, \dots, x_n \in \mathbb{R}$  be arbitrary real numbers and  $a_1, \dots, a_n$  be arbitrary complex numbers. Let us compute the quadratic form directly

$$\sum_{j,k=1}^n f(x_j - x_k) a_j \overline{a_k} = \int_{\mathbb{R}} \sum_{j,k=1}^n e^{-i(x_j - x_k)t} a_j \overline{a_k} g(t) dt = \int_{\mathbb{R}} \left| \sum_{j=1}^n a_j e^{-ix_j t} \right|^2 g(t) dt \geq 0.$$

□

**Lemma 8** (Lemma 1 in [35]). *A homogeneous kernel is positive definite if, and only if, its signature  $\mathcal{K}(\lambda)$  is a positive definite function.*

Since  $\frac{2 \operatorname{sech}(\pi w)}{1 + 4w^2} \geq 0$  holds for  $\forall w \in \mathbb{R}$ , we deduce that  $\mathcal{K}(\lambda)$  is the Fourier transform of a non-negative function. Lemma 7 implies that  $\mathcal{K}(\lambda)$  is a positive definite function. Therefore  $k$  is a positive definite kernel by Lemma 8.

Let us define the feature map

$$\Phi_w(x) \triangleq e^{-iw \ln(x)} \sqrt{x \frac{2 \operatorname{sech}(\pi w)}{1 + 4w^2}}.$$

Since  $k(x, y)$  is homogeneous, we have

$$\begin{aligned} k(x, y) &= \sqrt{xy} k(\sqrt{x/y}, \sqrt{y/x}) = \sqrt{xy} \mathcal{K}(\ln(y/x)) \\ &= \sqrt{xy} \int_{\mathbb{R}} e^{-i \ln(y/x) w} \frac{2 \operatorname{sech}(\pi w)}{1 + 4w^2} dw = \int_{\mathbb{R}} \Phi_w(x)^* \Phi_w(y) dw. \end{aligned}$$

### A.8 Proof of Theorem 4

Let  $z$  denote the merged value. If we define  $\eta(u) \triangleq -u \ln(u)$ , the mutual information loss is

$$\begin{aligned} \text{mil}(\mathbf{x}, \mathbf{y}) &= \sum_{c \in \mathcal{C}} \left[ p(c, x) \ln \frac{p(c, x)}{p(c)p(x)} + p(c, y) \ln \frac{p(c, y)}{p(c)p(y)} - p(c, z) \ln \frac{p(c, z)}{p(c)p(z)} \right] \\ &= \sum_{c \in \mathcal{C}} \left[ p(c, x) \ln \frac{p(c, x)}{p(x)} + p(c, y) \ln \frac{p(c, y)}{p(y)} - p(c, z) \ln \frac{p(c, z)}{p(z)} \right] \\ &= \eta(p(x)) + \eta(p(y)) - \eta(p(z)) - \sum_{c \in \mathcal{C}} [\eta(p(c, x)) + \eta(p(c, y)) - \eta(p(c, z))] . \end{aligned}$$

By the definition of  $k$ , we have

$$k(a, b) = \eta(a) + \eta(b) - \eta(a + b) .$$

As a result, we re-write  $\text{mil}(\mathbf{x}, \mathbf{y})$  as

$$\text{mil}(\mathbf{x}, \mathbf{y}) = k(p(x), p(y)) - \sum_{c \in \mathcal{C}} k(p(c, x), p(c, y)) = K_1(\mathbf{x}, \mathbf{y}) - K_2(\mathbf{x}, \mathbf{y}) .$$

Lemma 3 indicates that  $k$  is a positive definite kernel. In light of the techniques for constructing new kernels presented in [8, Section 6.2], we obtain that  $K_1$  and  $K_2$  are positive definite kernels.

### A.9 Proof of Lemma 4

Recall that  $k(x, y) = \int_{\mathbb{R}} \Phi_w(x)^* \Phi_w(y) dw$ . We have

$$\begin{aligned} \left| k(x, y) - \int_{-t}^t \Phi_w(x)^* \Phi_w(y) dw \right| &= \left| \int_{|w| > t} \Phi_w(x)^* \Phi_w(y) dw \right| \leq \int_{|w| > t} \left| e^{iw \ln(x/y)} \sqrt{xy} \rho(w) \right| dw \\ &\stackrel{(a)}{\leq} 2 \int_t^\infty \rho(w) dw \stackrel{(b)}{\leq} 8 \int_t^\infty e^{-\pi w} dw = \frac{8}{\pi} e^{-\pi t} \leq 4e^{-t} , \end{aligned}$$

where (a) is due to  $|e^{iw \ln(x/y)} \sqrt{xy}| \leq 1$  and (b) is due to

$$\frac{2 \operatorname{sech}(\pi w)}{1 + 4w^2} \leq 2 \operatorname{sech}(\pi w) = \frac{4}{e^{\pi w} + e^{-\pi w}} \leq 4e^{-\pi w} .$$

### A.10 Proof of Lemma 5

As the first step, we re-write the integral

$$\int_{-\Delta J}^{\Delta J} \Phi_w(x)^* \Phi_w(y) dw = \sum_{j=-J+1}^J \int_{(j-1)\Delta}^{j\Delta} e^{iw \ln(x/y)} \sqrt{xy} \rho(w) dw .$$

Then we bound the discretization error

$$\begin{aligned} &\left| \int_{-\Delta J}^{\Delta J} \Phi_w(x)^* \Phi_w(y) dw - \sum_{j=-J+1}^J \int_{(j-1)\Delta}^{j\Delta} e^{iw_j \ln(x/y)} \sqrt{xy} \rho(w) dw \right| \\ &\leq \sum_{j=-J+1}^J \int_{(j-1)\Delta}^{j\Delta} \left| e^{iw \ln(x/y)} - e^{iw_j \ln(x/y)} \right| \sqrt{xy} \rho(w) dw \\ &\stackrel{(a)}{\leq} \sum_{j=-J+1}^J \int_{(j-1)\Delta}^{j\Delta} |\ln(x/y)| \frac{\Delta}{2} \sqrt{xy} \rho(w) dw = \frac{\Delta}{2} \sqrt{xy} |\ln(x/y)| \int_{-\Delta J}^{\Delta J} \rho(w) dw \stackrel{(b)}{\leq} 2\Delta , \end{aligned}$$

where (a) is due to

$$\left| e^{iw \ln(x/y)} - e^{iw_j \ln(x/y)} \right| \leq |\ln(x/y)| |w - w_j| \leq \frac{\Delta}{2} |\ln(x/y)| .$$

and (b) is due to  $\int_{-\Delta}^{\Delta} \rho(w)dw \leq \int_{\mathbb{R}} \rho(w)dw = 2\ln 2$  and  $\sqrt{xy}|\ln(x/y)| \leq \sqrt{x}|\ln(x)| + \sqrt{y}|\ln(y)| \leq \frac{4}{e}$ .

Next we re-write the partial Riemann sum by substituting the new index  $k = 1 - j$

$$\begin{aligned} \sum_{j=-J+1}^0 \int_{(j-1)\Delta}^{j\Delta} e^{iw_j \ln(x/y)} \sqrt{xy} \rho(w) dw &= \sum_{k=1}^J \int_{-k\Delta}^{(1-k)\Delta} e^{i(1/2-k)\Delta \ln(x/y)} \sqrt{xy} \rho(w) dw \\ &= \sum_{k=1}^J \int_{(k-1)\Delta}^{k\Delta} e^{-iw_k \ln(x/y)} \sqrt{xy} \rho(w) dw. \end{aligned}$$

Therefore the entire Riemann sum can be re-written as

$$\begin{aligned} \sum_{j=-J+1}^J \int_{(j-1)\Delta}^{j\Delta} e^{iw_j \ln(x/y)} \sqrt{xy} \rho(w) dw &= \sum_{j=1}^J \int_{(j-1)\Delta}^{j\Delta} (e^{iw_j \ln(x/y)} + e^{-iw_j \ln(x/y)}) \sqrt{xy} \rho(w) dw \\ &= 2 \sum_{j=1}^J (\cos(w_j \ln x) \cos(w_j \ln y) + \sin(w_j \ln x) \sin(w_j \ln y)) \sqrt{xy} \int_{(j-1)\Delta}^{j\Delta} \rho(w) dw \\ &= \left\langle \bigoplus_{j=1}^J \tau(x, w_j, j), \bigoplus_{j=1}^J \tau(y, w_j, j) \right\rangle. \end{aligned}$$

## Appendix B Illustration of Upper and Lower Bound Functions

We illustrate the upper and lower bound functions  $U(\lambda)$  and  $L(\lambda)$  in Fig. 3.

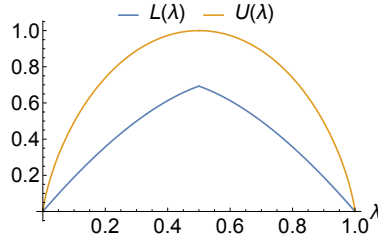

Figure 3: Upper and lower functions  $U(\lambda)$  and  $L(\lambda)$ .

## Appendix C Precision vs. Sketch Size

We show the precision vs. the sketch size in Fig. 4.

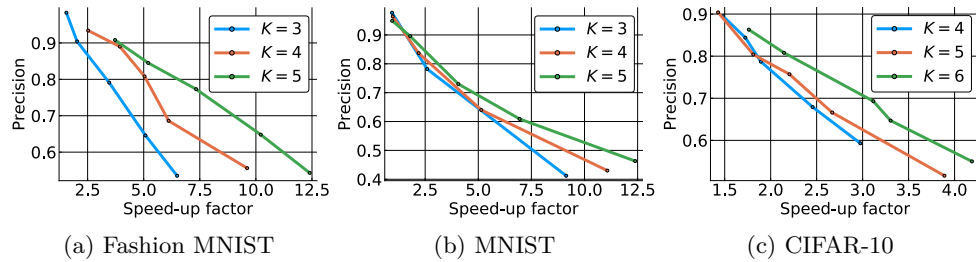

Figure 4: Precision vs. speed-up factor for different sketch sizes.
